# Supplementary material for: Beyond human-likeness: Socialness is more influential when attributing mental states to robots
Source: PubMed Central journal article supplement (PMC11214418; doi:10.1016/j.isci.2024.110070), 2024-05-22
Supplement: mmc1.pdf [file mmc1.pdf]

iScience, Volume 27

## **Supplemental information**

### **Beyond human-likeness: Socialness is more influential when attributing mental states to robots**

**Laura E. Jastrzab, Bishakha Chaudhury, Sarah A. Ashley, Kami Koldewyn, and Emily S. Cross**

## Supplemental Information

**Table S1. T1 acquisition parameters by site, Related to STAR Methods.**

|                                                                                    | Site 1                | Site 2                  |
|------------------------------------------------------------------------------------|-----------------------|-------------------------|
| Repetition time (ms)                                                               | 23                    | 18                      |
| Echo time (ms)                                                                     | 3.0                   | 3.5                     |
| Acquired voxel size (mm)                                                           | 1 x 1 x 2             | 1 x 1 x 2               |
| Reconstructed voxel size (mm)                                                      | 1 x 1 x 1             | 1 x 1 x 1               |
| Number of slices (contiguous axial)                                                | 176                   | 192                     |
| Flip angle                                                                         | 9°                    | 8°                      |
| Field of view (mm)                                                                 | 256 x 256             | 256 x 256               |
| Acquisition matrix size                                                            | 256 x 220             | 256 x 220               |
| Reconstruction matrix                                                              | 256                   | 256                     |
| Total acquisition time                                                             | 6 min                 | 6 min                   |
| Pulse sequence                                                                     | T1                    | T1                      |
| 3T MRI system                                                                      | Siemens TrioTim       | Philips Ingenia Elition |
| Site                                                                               | University of Glasgow | Bangor University       |
| Note. Both sites used a gradient echo, multi-shot turbo field echo pulse sequence. |                       |                         |

**Table S2. BOLD acquisition parameters by site, Related to STAR Methods.**

|                                                                                                                                                                                                                                                                                                                                                                                                                                      | Site 1                   | Site 2                  |
|--------------------------------------------------------------------------------------------------------------------------------------------------------------------------------------------------------------------------------------------------------------------------------------------------------------------------------------------------------------------------------------------------------------------------------------|--------------------------|-------------------------|
| Repetition time (ms)                                                                                                                                                                                                                                                                                                                                                                                                                 | 2000                     | 2000                    |
| Echo time (ms)                                                                                                                                                                                                                                                                                                                                                                                                                       | 13 / 31                  | 12 / 31                 |
| Voxel size (mm)                                                                                                                                                                                                                                                                                                                                                                                                                      | 2.75 x 2.75 x 4          | 2.75 x 2.75 x 4         |
| Number of slices                                                                                                                                                                                                                                                                                                                                                                                                                     | 32                       | 32                      |
| Flip angle                                                                                                                                                                                                                                                                                                                                                                                                                           | 85°                      | 85°                     |
| Field of view (mm)                                                                                                                                                                                                                                                                                                                                                                                                                   | 220 x 220                | 220 x 220               |
| Matrix size                                                                                                                                                                                                                                                                                                                                                                                                                          | 80 x 80                  | 80 x 80                 |
| Slice acquisition                                                                                                                                                                                                                                                                                                                                                                                                                    | Ascending                | Ascending               |
| Phase encoding                                                                                                                                                                                                                                                                                                                                                                                                                       | Anterior-posterior       | Anterior-posterior      |
| Acquisition orientation                                                                                                                                                                                                                                                                                                                                                                                                              | 45° from AC-PC           | 45° from AC-PC          |
| Number of volumes (RPS)*                                                                                                                                                                                                                                                                                                                                                                                                             | 239                      | 240                     |
| Number of volumes (ToM)                                                                                                                                                                                                                                                                                                                                                                                                              | 174                      | 174                     |
| Number of volumes (INT)*                                                                                                                                                                                                                                                                                                                                                                                                             | 76                       | 72                      |
| Pulse sequence                                                                                                                                                                                                                                                                                                                                                                                                                       | dual-echo EPI            | dual-echo EPI           |
| Parallel imaging parameters                                                                                                                                                                                                                                                                                                                                                                                                          | GRAPPA accel. factor (3) | SENSE factor (3)        |
| Head coil                                                                                                                                                                                                                                                                                                                                                                                                                            | 32-channel               | 32-channel              |
| 3T MRI system                                                                                                                                                                                                                                                                                                                                                                                                                        | Siemens TrioTim          | Philips Ingenia Elition |
| Site                                                                                                                                                                                                                                                                                                                                                                                                                                 | University of Glasgow    | Bangor University       |
| <p>Note. RPS = Rock Paper Scissors task (main task); ToM = Theory of Mind localizer task (Partly Cloudy movie; Jacoby et al., 2018); INT = Interaction Localizer task (Walbrin &amp; Koldewyn, 2018); Number of volumes for each functional scan were trimmed for analyses so that there were the same number of volumes per site resulting in: (1) 239 volumes for the RPS task, (2) 72 volumes for the Interaction Task (INT).</p> |                          |                         |

**Table S3. Whole-brain activation peaks in localizers, Related to STAR Methods.**

|                                           |                                  | Coordinates |     |     | Peak                     |      | Cluster-level       |                  |
|-------------------------------------------|----------------------------------|-------------|-----|-----|--------------------------|------|---------------------|------------------|
|                                           |                                  | x           | y   | z   | t-value                  | k    | p <sub>uncorr</sub> | p <sub>FWE</sub> |
| <b>ToM &gt; Pain</b>                      |                                  |             |     |     |                          |      |                     |                  |
| -                                         | Precuneus                        | 16          | -56 | 22  | 8.30                     | 2524 | <0.001              | <0.001           |
| R                                         | Temporal-Parietal Junction*      | 48          | -65 | 32  | 8.50                     | 1217 | <0.001              | <0.001           |
| L                                         | Temporal-Parietal Junction       | -46         | -62 | 38  | 6.90                     | 923  | <0.001              | <0.001           |
| L                                         | Middle Frontal Gyrus             | -36         | 8   | 54  | 5.14                     | 145  | 0.003               | 0.043            |
| <b>Interaction &gt; Non-Interaction</b>   |                                  |             |     |     |                          |      |                     |                  |
| R                                         | Posterior Superior Temp Sulcus   | 54          | -48 | 18  | 4.92                     | 448  | <0.001              | <0.001           |
| L                                         | Posterior Superior Temp Sulcus*  | -56         | -54 | 22  | 5.29                     | 158  | 0.004               | 0.048            |
| <b>Additional ROIs from other sources</b> |                                  |             |     |     | <b>Coordinate Source</b> |      |                     |                  |
|                                           | Dorsal Medial Prefrontal Cortex  | -10         | 56  | 32  | Jacoby et al. (2016)     |      |                     |                  |
|                                           | Ventral Medial Prefrontal Cortex | 2           | 54  | -12 | Jacoby et al. (2016)     |      |                     |                  |
| R                                         | Middle Frontal Gyrus             | 24          | 28  | 40  | Jacoby et al. (2016)     |      |                     |                  |
| R                                         | V1 (BA 17)                       |             |     |     | WFU PickAtlas            |      |                     |                  |
| L                                         | V1 (BA 17)                       |             |     |     | WFU PickAtlas            |      |                     |                  |

Note. Significance level and size of activation cluster for the primary contrast (both p<sub>uncorr</sub> and p<sub>FWEcorr</sub> reported; minimal cluster size, k ≥ 0). Coordinates reported in MNI space. L = Left; R = Right. ToM Localizer uses a short film by Pixar (“Partly Cloudy”) to localize mentalizing regions of the brain (Jacoby et al. 2016). As our ToM localizer did not provide mPFC or rmFG coordinates, we created 6mm spheres in Marsbar for those ROIs based on coordinates from Jacoby et al. (2016). rTPJ (true peak coordinates: 50 -68 32) & lpSTS (true peak coordinates: -62 -54 22) coordinates reported in the table above were shifted from true peak so that spheres remained within the brain boundaries.

**Table S4. Whole Brain activation peaks with their localization for RPS task, Related to Figure 2.**

|                                |                                    | MNI Coordinates (mm) |     |     | Peak<br>t-value | Cluster<br>Extent<br>(voxels) | Cluster-level       |                  |
|--------------------------------|------------------------------------|----------------------|-----|-----|-----------------|-------------------------------|---------------------|------------------|
|                                |                                    | x                    | y   | z   |                 | k                             | p <sub>uncorr</sub> | p <sub>FWE</sub> |
| <b>Mechanoid &gt; Computer</b> |                                    |                      |     |     |                 |                               |                     |                  |
| -                              | -                                  | -                    | -   | -   | -               | -                             | ns                  | ns               |
| <b>Humanoid &gt; Computer</b>  |                                    |                      |     |     |                 |                               |                     |                  |
| -                              | -                                  | -                    | -   | -   | -               | -                             | ns                  | ns               |
| <b>Human &gt; Computer</b>     |                                    |                      |     |     |                 |                               |                     |                  |
| -                              | Medial Prefrontal Cortex           | 4                    | 48  | 24  | 5.95            | 1264                          | <0.001              | <0.001           |
| R                              | Temporal-Parietal Junction         | 50                   | -46 | 20  | 5.42            | 864                           | <0.001              | <0.001           |
| -                              | Thalamus                           | 6                    | 8   | 2   | 5.23            | 619                           | <0.001              | 0.001            |
| -                              | Superior Medial Prefrontal Cortex  | -2                   | 28  | 58  | 5.11            | 632                           | <0.001              | <0.001           |
| R                              | Posterior Superior Temporal Sulcus | 54                   | -20 | -14 | 5.07            | 330                           | 0.001               | 0.005            |
|                                | Precuneus                          | -2                   | -50 | 30  | 4.82            | 859                           | <0.001              | <0.001           |
| L                              | Middle Frontal Gyrus               | -42                  | 14  | 50  | 4.65            | 318                           | 0.001               | 0.006            |
| R                              | Middle Frontal Gyrus               | 40                   | 12  | 52  | 4.58            | 285                           | 0.001               | 0.010            |
| L                              | Temporal-Parietal Junction         | -54                  | -50 | 26  | 4.56            | 390                           | <0.001              | 0.002            |
| L                              | Cerebellum                         | -14                  | -82 | -32 | 4.33            | 252                           | 0.002               | 0.018            |
| <b>Human &gt; Humanoid</b>     |                                    |                      |     |     |                 |                               |                     |                  |
| R                              | Temporal-Parietal Junction         | 46                   | -54 | 28  | 7.24            | 1556                          | <0.001              | <0.001           |
| R                              | Pars Triangularis (IFG)            | 48                   | 26  | 18  | 7.06            | 3731                          | <0.001              | <0.001           |
| R                              | Posterior Superior Temporal Sulcus | 60                   | -22 | -12 | 6.37            | 1238                          | <0.001              | <0.001           |
| -                              | Precuneus                          | 4                    | -60 | 34  | 5.65            | 1361                          | <0.001              | <0.001           |
| -                              | Cerebellum Crus 1                  | -20                  | -82 | -30 | 5.18            | 600                           | <0.001              | <0.001           |
| R                              | Middle Frontal Gyrus               | 34                   | 32  | 44  | 4.83            | 1045                          | <0.001              | <0.001           |
| -                              | Nucleus Accumbens                  | 8                    | 10  | -14 | 4.78            | 222                           | 0.004               | 0.031            |
| L                              | Temporal-Parietal Junction         | -48                  | -48 | 30  | 4.39            | 428                           | <0.001              | 0.001            |

SOCIALNESS & ROBOTICS

| Human > Mechanoid                  |                                    |     |     |     |      |      |        |        |
|------------------------------------|------------------------------------|-----|-----|-----|------|------|--------|--------|
| R                                  | Temporal-Parietal Junction         | 48  | -44 | 26  | 5.20 | 907  | <0.001 | <0.001 |
| L                                  | Cerebellum Crus 1                  | -20 | -82 | -30 | 5.18 | 261  | 0.002  | 0.018  |
| R                                  | Precuneus                          | 6   | -56 | 32  | 4.90 | 365  | <0.001 | 0.004  |
| R                                  | Posterior Superior Temporal Sulcus | 52  | -20 | -8  | 4.21 | 212  | 0.005  | 0.039  |
| Humanoid > Mechanoid               |                                    |     |     |     |      |      |        |        |
| -                                  | -                                  | -   | -   | -   | -    | -    | -      | -      |
| Mechanoid > Humanoid               |                                    |     |     |     |      |      |        |        |
|                                    | Nucleus Accumbens                  | -4  | 10  | -10 | 4.91 | 313  | <0.001 | 0.003  |
| Human-likeness (CP > MR > HR > HP) |                                    |     |     |     |      |      |        |        |
| -                                  | Medial Prefrontal Cortex           | 2   | 48  | 24  | 5.46 | 483  | <0.001 | <0.001 |
| R                                  | Temporal-Parietal Junction         | 50  | -46 | 22  | 5.27 | 778  | <0.001 | <0.001 |
| -                                  | Superior Medial Prefrontal Cortex  | 0   | 32  | 54  | 4.72 | 453  | <0.001 | 0.001  |
| -                                  | Precuneus                          | 12  | -50 | 42  | 4.63 | 616  | <0.001 | <0.001 |
| -                                  | Nucleus Accumbens                  | 6   | 8   | 2   | 4.63 | 242  | 0.002  | 0.018  |
| R                                  | Middle Frontal Gyrus               | 34  | 54  | 4   | 4.53 | 188  | 0.005  | 0.048  |
| L                                  | Middle Frontal Gyrus               | -46 | 14  | 44  | 4.22 | 225  | 0.003  | 0.025  |
| Socialness (CP > HR > MR > HP)     |                                    |     |     |     |      |      |        |        |
| -                                  | Medial Prefrontal Cortex           | -6  | 44  | 18  | 6.12 | 1727 | <0.001 | <0.001 |
| R                                  | Temporal-Parietal Junction         | 50  | -50 | 18  | 5.52 | 859  | <0.001 | <0.001 |
| -                                  | Nucleus Accumbens                  | 6   | 8   | 2   | 5.40 | 745  | <0.001 | <0.001 |
| R                                  | Posterior Superior Temporal Sulcus | 56  | -28 | -12 | 5.30 | 403  | <0.001 | 0.002  |
| L                                  | Posterior Superior Temporal Sulcus | -56 | -22 | -10 | 5.26 | 242  | 0.002  | 0.022  |
| L                                  | Middle Frontal Gyrus               | -24 | 54  | 18  | 5.16 | 270  | 0.002  | 0.014  |
| L                                  | Supplementary Motor Area           | -2  | 26  | 58  | 5.14 | 819  | <0.001 | <0.001 |
| -                                  | Precuneus                          | 12  | -52 | 42  | 4.86 | 954  | <0.001 | <0.001 |
| L                                  | Middle Frontal Gyrus               | -42 | 14  | 50  | 4.82 | 332  | 0.001  | 0.006  |
| R                                  | Pars Triangularis                  | 46  | 24  | 14  | 4.74 | 618  | <0.001 | <0.001 |
| L                                  | Temporal-Parietal Junction         | -58 | -50 | 28  | 4.64 | 506  | <0.001 | <0.001 |

## SOCIALNESS & ROBOTICS

|   |                      |     |     |     |      |     |        |       |
|---|----------------------|-----|-----|-----|------|-----|--------|-------|
| R | Middle Frontal Gyrus | 40  | 12  | 52  | 4.57 | 407 | <0.001 | 0.002 |
| L | Cerebellum Crus 2    | -12 | -82 | -44 | 4.45 | 285 | 0.001  | 0.011 |

Note. Significance level and size of activation cluster for each of the contrasts and the parametric modulation listed above (both  $p_{\text{uncorr}}$  and  $p_{\text{FWEcorr}}$  reported; no minimal cluster threshold). Coordinates reported in MNI space.

**Table S5. rmANOVAs for PSC in each ROI, Related to Figure 1.**

|                         |              | Within-Subjects Effects |      |            |      | Pairwise Comparisons |       |           |       | Within-Subjects Contrasts<br>(Linear)<br>H: Humanness model<br>S: Socialness model |       |            |        |      |
|-------------------------|--------------|-------------------------|------|------------|------|----------------------|-------|-----------|-------|------------------------------------------------------------------------------------|-------|------------|--------|------|
|                         |              |                         |      |            |      | P-value              |       | Cohen's d |       |                                                                                    |       |            |        |      |
| Mean ± SD               | df           | F                       | p    | $\eta_p^2$ | CP   | MR                   | HR    | HP        | df    | F                                                                                  | p     | $\eta_p^2$ |        |      |
| <b>rTPJ<sup>§</sup></b> |              |                         |      |            |      |                      |       |           |       |                                                                                    |       |            |        |      |
| Computer                | -0.15 ± 0.21 | 2.5,<br>103.83          | 6.78 | <0.001     | 0.14 |                      | 0.09  | 0.14      | -0.14 | H                                                                                  | 1, 41 | 3.67       | 0.063  | 0.08 |
| Mechanoid               | -0.17 ± 0.23 |                         |      |            |      | ns                   |       | 0.04      | -0.22 |                                                                                    |       |            |        |      |
| Humanoid                | -0.18 ± 0.23 |                         |      |            |      | ns                   | ns    |           | -0.26 | S                                                                                  |       |            |        |      |
| Human                   | -0.12 ± 0.23 |                         |      |            |      | ns                   | **    | ***       |       |                                                                                    |       |            |        |      |
| <b>ITPJ</b>             |              |                         |      |            |      |                      |       |           |       |                                                                                    |       |            |        |      |
| Computer                | -0.03 ± 0.23 | 3,<br>123               | 7.60 | <0.001     | 0.16 |                      | -0.09 | 0         | -0.37 | H                                                                                  | 1, 41 | 7.60       | <0.001 | 0.16 |
| Mechanoid               | -0.01 ± 0.21 |                         |      |            |      | ns                   |       | 0.10      | -0.29 |                                                                                    |       |            |        |      |
| Humanoid                | -0.03 ± 0.21 |                         |      |            |      | ns                   | ns    |           | -0.39 | S                                                                                  |       |            |        |      |
| Human                   | 0.05 ± 0.20  |                         |      |            |      | ***                  | **    | **        |       |                                                                                    |       |            |        |      |
| <b>rmFG<sup>§</sup></b> |              |                         |      |            |      |                      |       |           |       |                                                                                    |       |            |        |      |
| Computer                | -0.12 ± 0.21 | 2.56,<br>104.84         | 2.28 | 0.092      | 0.05 |                      |       |           |       |                                                                                    |       |            |        |      |
| Mechanoid               | -0.14 ± 0.20 |                         |      |            |      |                      |       |           |       |                                                                                    |       |            |        |      |
| Humanoid                | -0.15 ± 0.21 |                         |      |            |      |                      |       |           |       |                                                                                    |       |            |        |      |
| Human                   | -0.11 ± 0.19 |                         |      |            |      |                      |       |           |       |                                                                                    |       |            |        |      |
| <b>ImFG<sup>§</sup></b> |              |                         |      |            |      |                      |       |           |       |                                                                                    |       |            |        |      |
| Computer                | 0.00 ± 0.17  | 2.27,<br>92.92          | 3.17 | 0.040      | 0.07 |                      | -0.17 | 0         | -0.28 | H                                                                                  | 1, 41 | 4.62       | 0.038  | 0.10 |
| Mechanoid               | 0.03 ± 0.18  |                         |      |            |      | ns                   |       | 0.17      | -0.11 |                                                                                    |       |            |        |      |
| Humanoid                | 0.00 ± 0.18  |                         |      |            |      | ns                   | ns    |           | -0.27 | S                                                                                  |       |            |        |      |
| Human                   | 0.05 ± 0.19  |                         |      |            |      | ns                   | ns    | ns        |       |                                                                                    |       |            |        |      |
| <b>Precuneus</b>        |              |                         |      |            |      |                      |       |           |       |                                                                                    |       |            |        |      |
| Computer                | -0.18 ± 0.17 | 3,<br>123               | 1.04 | 0.376      | 0.03 |                      |       |           |       |                                                                                    |       |            |        |      |
| Mechanoid               | -0.17 ± 0.19 |                         |      |            |      |                      |       |           |       |                                                                                    |       |            |        |      |



SOCIALNESS & ROBOTICS

|                        |              |           |           |        |      |     |       |       |       |   |       |       |        |       |  |  |  |
|------------------------|--------------|-----------|-----------|--------|------|-----|-------|-------|-------|---|-------|-------|--------|-------|--|--|--|
| Humanoid               | -0.19 ± 0.18 |           |           |        |      |     |       |       |       |   |       |       |        |       |  |  |  |
| Human                  | -0.16 ± 0.20 |           |           |        |      |     |       |       |       |   |       |       |        |       |  |  |  |
| <b>dmPFC</b>           |              |           |           |        |      |     |       |       |       |   |       |       |        |       |  |  |  |
| Computer               | -0.22 ± 0.21 | 3,<br>123 | 2.19      | 0.092  | 0.05 |     |       |       |       |   |       |       |        |       |  |  |  |
| Mechanoid              | -0.20 ± 0.20 |           |           |        |      |     |       |       |       |   |       |       |        |       |  |  |  |
| Humanoid               | -0.24 ± 0.22 |           |           |        |      |     |       |       |       |   |       |       |        |       |  |  |  |
| Human                  | -0.20 ± 0.20 |           |           |        |      |     |       |       |       |   |       |       |        |       |  |  |  |
| <b>vmPFC</b>           |              |           |           |        |      |     |       |       |       |   |       |       |        |       |  |  |  |
| Computer               | -0.50 ± 0.44 | 3,<br>123 | 2.16      | 0.097  | 0.05 |     |       |       |       |   |       |       |        |       |  |  |  |
| Mechanoid              | -0.49 ± 0.50 |           |           |        |      |     |       |       |       |   |       |       |        |       |  |  |  |
| Humanoid               | -0.55 ± 0.51 |           |           |        |      |     |       |       |       |   |       |       |        |       |  |  |  |
| Human                  | -0.47 ± 0.43 |           |           |        |      |     |       |       |       |   |       |       |        |       |  |  |  |
| <b>rpSTS</b>           |              |           |           |        |      |     |       |       |       |   |       |       |        |       |  |  |  |
| Computer               | -0.02 ± 0.25 | 3,<br>123 | 12.3<br>9 | <0.001 | 0.23 |     | -0.08 | 0     | -0.38 | H | 1, 41 | 18.87 | <0.001 | 0.315 |  |  |  |
| Mechanoid              | 0.00 ± 0.25  |           |           |        |      | ns  |       | 0.08  | -0.30 |   |       |       |        |       |  |  |  |
| Humanoid               | -0.02 ± 0.25 |           |           |        |      | ns  | ns    |       | -0.38 | S | 1,41  | 25.27 | <0.001 | 0.381 |  |  |  |
| Human                  | 0.07 ± 0.22  |           |           |        |      | *** | **    | ***   |       |   |       |       |        |       |  |  |  |
| <b>rpSTS (Video 1)</b> |              |           |           |        |      |     |       |       |       |   |       |       |        |       |  |  |  |
| Computer               | 0.07 ± 0.14  | 3,<br>123 | 29.4<br>0 | <0.001 | 0.42 |     | -0.73 | -0.54 | -1.40 | H | 1, 38 | 52.30 | <0.001 | 0.561 |  |  |  |
| Mechanoid              | 0.20 ± 0.21  |           |           |        |      | *** |       | 0.20  | -0.57 |   |       |       |        |       |  |  |  |
| Humanoid               | 0.16 ± 0.19  |           |           |        |      | ns  | 0.029 |       | -0.80 | S | 1, 41 | 77.98 | <0.001 | 0.655 |  |  |  |
| Human                  | 0.32 ± 0.21  |           |           |        |      | *** | ***   | ***   |       |   |       |       |        |       |  |  |  |
| <b>IpSTS</b>           |              |           |           |        |      |     |       |       |       |   |       |       |        |       |  |  |  |
| Computer               | -0.11 ± 0.26 | 3,<br>123 | 6.96      | <0.001 | 0.15 |     | -0.08 | 0     | 0.91  | H | 1,41  | 16.33 | <0.001 | 0.285 |  |  |  |
| Mechanoid              | -0.09 ± 0.26 |           |           |        |      | ns  |       | 0.07  | 0.98  |   |       |       |        |       |  |  |  |
| Humanoid               | -0.11 ± 0.29 |           |           |        |      | ns  | ns    |       | 0.86  | S | 1, 41 | 16.22 | <0.001 | 0.283 |  |  |  |
| Human                  | -0.35 ± 0.27 |           |           |        |      | *** | *     | *     |       |   |       |       |        |       |  |  |  |
| <b>IpSTS (Video1)</b>  |              |           |           |        |      |     |       |       |       |   |       |       |        |       |  |  |  |

SOCIALNESS & ROBOTICS

|                                                                                                                                                |             |                 |           |        |      |       |       |       |       |   |       |       |        |       |
|------------------------------------------------------------------------------------------------------------------------------------------------|-------------|-----------------|-----------|--------|------|-------|-------|-------|-------|---|-------|-------|--------|-------|
| Computer                                                                                                                                       | 0.04 ± 0.20 | 3,<br>123       | 13.2<br>6 | <0.001 | 0.24 |       | -0.32 | -0.20 | -0.79 | H | 1, 41 | 22.64 | <0.001 | 0.356 |
| Mechanoid                                                                                                                                      | 0.10 ± 0.18 |                 |           |        |      | 0.056 |       | 0.11  | -0.50 |   |       |       |        |       |
| Humanoid                                                                                                                                       | 0.08 ± 0.20 |                 |           |        |      | ns    | ns    |       | -0.58 | S | 1, 41 | 31.27 | <0.001 | 0.433 |
| Human                                                                                                                                          | 0.19 ± 0.18 |                 |           |        |      | ***   | **    | ***   |       |   |       |       |        |       |
| <b>rV1<sup>§</sup> (BA17)</b>                                                                                                                  |             |                 |           |        |      |       |       |       |       |   |       |       |        |       |
| Computer                                                                                                                                       | 0.20 ± 0.39 | 2.42,<br>91.93  | 1.10      | 0.341  | 0.03 |       |       |       |       |   |       |       |        |       |
| Mechanoid                                                                                                                                      | 0.20 ± 0.34 |                 |           |        |      |       |       |       |       |   |       |       |        |       |
| Humanoid                                                                                                                                       | 0.19 ± 0.37 |                 |           |        |      |       |       |       |       |   |       |       |        |       |
| Human                                                                                                                                          | 0.25 ± 0.36 |                 |           |        |      |       |       |       |       |   |       |       |        |       |
| <b>IV1<sup>§</sup> (BA17)</b>                                                                                                                  |             |                 |           |        |      |       |       |       |       |   |       |       |        |       |
| Computer                                                                                                                                       | 0.09 ± 0.27 | 2.50,<br>102.19 | 0.97      | 0.400  | 0.23 |       |       |       |       |   |       |       |        |       |
| Mechanoid                                                                                                                                      | 0.09 ± 0.27 |                 |           |        |      |       |       |       |       |   |       |       |        |       |
| Humanoid                                                                                                                                       | 0.08 ± 0.26 |                 |           |        |      |       |       |       |       |   |       |       |        |       |
| Human                                                                                                                                          | 0.12 ± 0.23 |                 |           |        |      |       |       |       |       |   |       |       |        |       |
| Note: Total N = 42. All p-values reported are Bonferroni corrected, *p<0.05, **p<0.01, ***p<0.001. <sup>§</sup> Greenhouse-Geisser correction. |             |                 |           |        |      |       |       |       |       |   |       |       |        |       |

**Table S6. rmANOVAs for Debrief Questions, Related to Figure 3**

| Mean ± SD                       | Within-Subjects Effects |                 |       |                | Pairwise Comparisons |     |           |       | Within-Subjects Contrasts<br>(Linear)<br>H: Humanness<br>S: Socialness |   |       |                |       |      |
|---------------------------------|-------------------------|-----------------|-------|----------------|----------------------|-----|-----------|-------|------------------------------------------------------------------------|---|-------|----------------|-------|------|
|                                 |                         |                 |       |                | P-value              |     | Cohen's d |       |                                                                        |   |       |                |       |      |
|                                 | df                      | F               | p     | η <sup>2</sup> | CP                   | MR  | HR        | HP    | df                                                                     | F | p     | η <sup>2</sup> |       |      |
| <b>Successful</b>               |                         |                 |       |                |                      |     |           |       |                                                                        |   |       |                |       |      |
| Computer                        | 6.00 ± 2.04             | 3, 123          | 0.50  | 0.685          | 0.012                |     | -         |       |                                                                        |   |       |                |       |      |
| Mechanoid                       | 5.83 ± 1.83             |                 |       |                |                      |     |           |       |                                                                        |   |       |                |       |      |
| Humanoid                        | 5.52 ± 1.49             |                 |       |                |                      |     |           |       |                                                                        |   |       |                |       |      |
| Human                           | 5.76 ± 1.78             |                 |       |                |                      |     |           |       |                                                                        |   |       |                |       |      |
| <b>Strategy</b>                 |                         |                 |       |                |                      |     |           |       |                                                                        |   |       |                |       |      |
| Computer                        | 5.24 ± 2.45             | 3, 123          | 0.32  | 0.811          | 0.008                |     | -         |       |                                                                        |   |       |                |       |      |
| Mechanoid                       | 5.29 ± 1.83             |                 |       |                |                      |     |           |       |                                                                        |   |       |                |       |      |
| Humanoid                        | 5.36 ± 1.87             |                 |       |                |                      |     |           |       |                                                                        |   |       |                |       |      |
| Human                           | 6.62 ± 1.78             |                 |       |                |                      |     |           |       |                                                                        |   |       |                |       |      |
| <b>Intelligence<sup>§</sup></b> |                         |                 |       |                |                      |     |           |       |                                                                        |   |       |                |       |      |
| Computer                        | 5.21 ± 2.82             | 2.51,<br>102.91 | 12.16 | < 0.001        | 0.229                |     | -0.09     | -0.34 | -0.92                                                                  | H | 1, 41 | 25.64          | <.001 | .385 |
| Mechanoid                       | 5.43 ± 1.96             |                 |       |                |                      | ns  |           | -0.30 | -1.02                                                                  |   |       |                |       |      |
| Humanoid                        | 6.05 ± 2.13             |                 |       |                |                      | ns  | ns        |       | -0.69                                                                  | S | 1, 41 | 14.80          | <.001 | .265 |
| Human                           | 7.48 ± 2.03             |                 |       |                |                      | *** | ***       | .007  |                                                                        |   |       |                |       |      |
| <b>Fun</b>                      |                         |                 |       |                |                      |     |           |       |                                                                        |   |       |                |       |      |
| Computer                        | 3.74 ± 2.43             | 3, 123          | 33.90 | < 0.001        | 0.453                |     | -1.39     | -0.74 | -1.75                                                                  | H | 1, 41 | 60.75          | <.001 | .597 |
| Mechanoid                       | 7.02 ± 2.30             |                 |       |                |                      | *** |           | 0.64  | -0.18                                                                  |   |       |                |       |      |
| Humanoid                        | 5.52 ± 2.39             |                 |       |                |                      | *** | .006      |       | -0.91                                                                  | S | 1, 41 | 85.74          | <.001 | .677 |
| Human                           | 7.38 ± 1.65             |                 |       |                |                      | *** | ns        | ***   |                                                                        |   |       |                |       |      |
| <b>Competitive</b>              |                         |                 |       |                |                      |     |           |       |                                                                        |   |       |                |       |      |

SOCIALNESS & ROBOTICS

|                             |             |                 |       |         |       |     |       |       |       |   |       |        |       |      |
|-----------------------------|-------------|-----------------|-------|---------|-------|-----|-------|-------|-------|---|-------|--------|-------|------|
| Computer                    | 3.24 ± 3.03 | 3, 123          | 17.24 | < 0.001 | 0.296 |     | -1.16 | -0.68 | -1.15 | H | 1, 41 | 25.99  | <.001 | .388 |
| Mechanoid                   | 6.57 ± 2.69 |                 |       |         |       | *** |       | 0.47  | 0.15  |   |       |        |       |      |
| Humanoid                    | 5.26 ± 2.87 |                 |       |         |       | *** | .049  |       | -0.38 | S | 1, 41 | 34.36  | <.001 | .456 |
| Human                       | 6.21 ± 2.68 |                 |       |         |       | *** | ns    | ns    |       |   |       |        |       |      |
| <b>Sympathy<sup>§</sup></b> |             |                 |       |         |       |     |       |       |       |   |       |        |       |      |
| Computer                    | 0.71 ± 1.35 | 2.50,<br>102.58 | 58.59 | < 0.001 | 0.588 |     | -1.08 | -0.98 | -2.87 | H | 1, 41 | 136.94 | <.001 | .770 |
| Mechanoid                   | 3.45 ± 3.32 |                 |       |         |       | *** |       | 0.28  | -1.11 |   |       |        |       |      |
| Humanoid                    | 2.64 ± 2.44 |                 |       |         |       | *** | ns    |       | -1.63 | S | 1, 41 | 149.58 | <.001 | .785 |
| Human                       | 6.81 ± 2.68 |                 |       |         |       | *** | ***   | ***   |       |   |       |        |       |      |

Note: Total N = 42. All p-values reported are Bonferroni corrected, \*p<0.05, \*\*p<0.01, \*\*\*p<0.001. <sup>§</sup>Greenhouse-Geisser correction. Cohen's D for paired-sample t-test:  $(x_1 - x_2) / S_{pooled}$  ( $S_{pooled} = \sqrt{(S_1^2 + S_2^2) / 2}$ ).

Figure S1. Whole brain T-map overlap analysis, Related to Figure 2.

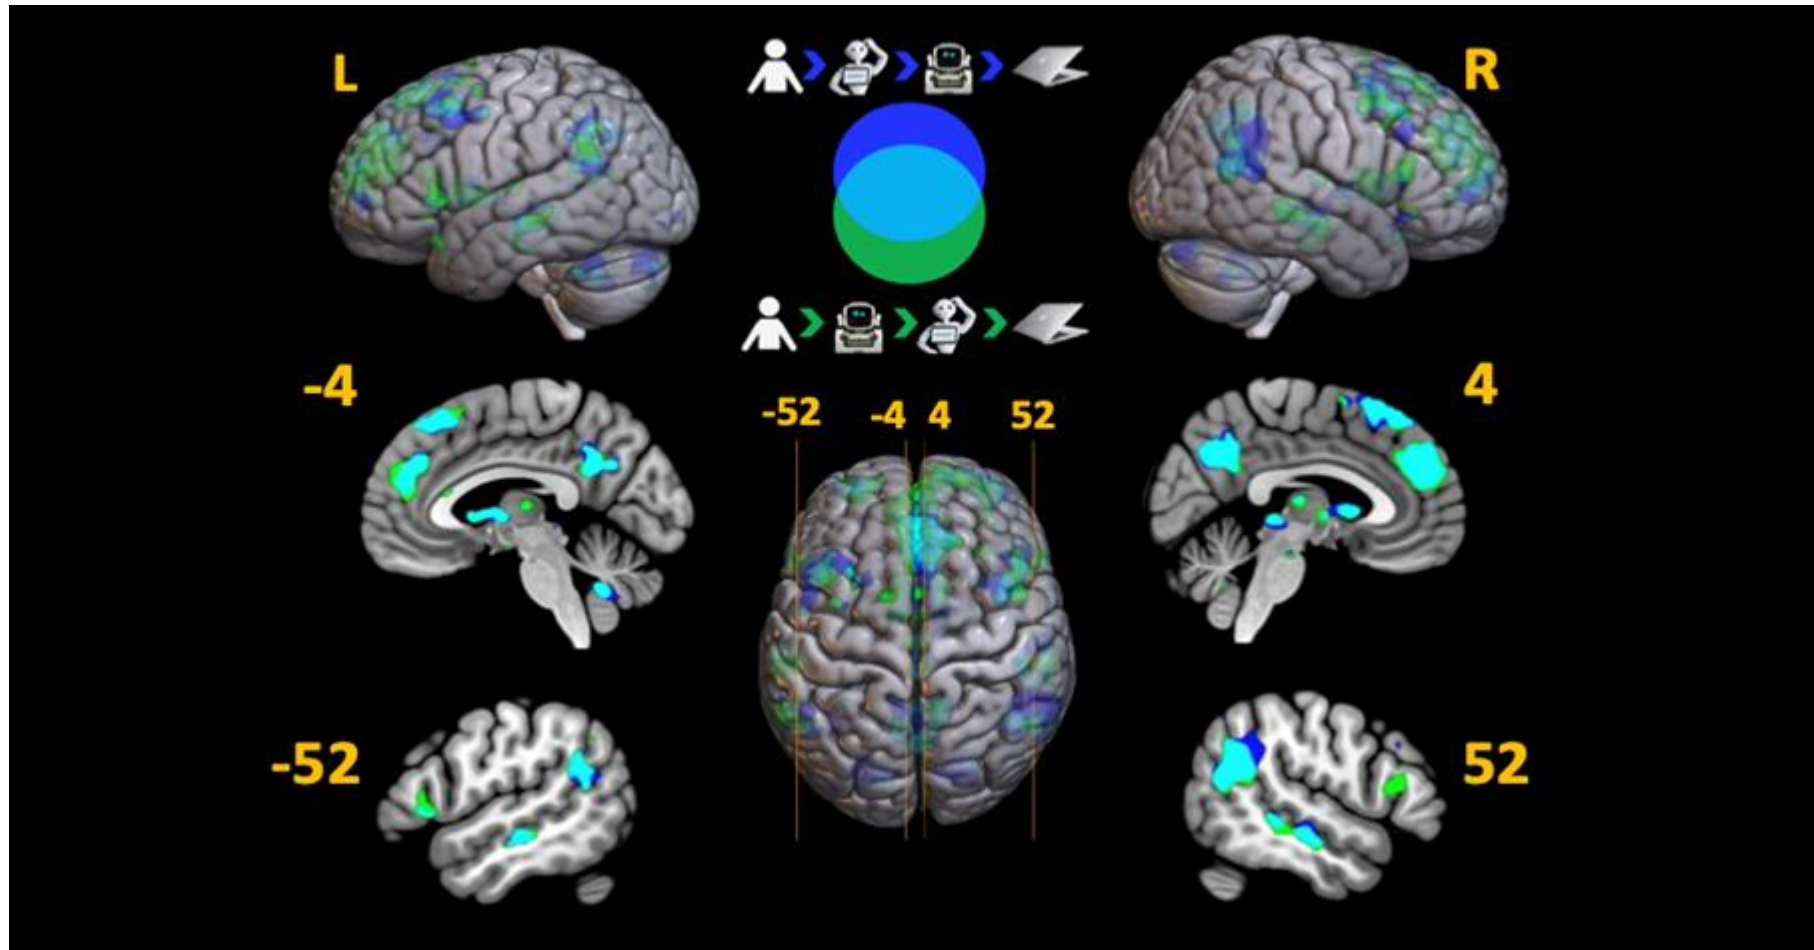

**Note.** Humanness Model (Human > Humanoid > Mechanoid > Computer ; Blue) and the Socialness model (Human > Mechanoid > Humanoid > Computer; Green) - overlap is Teal.  $p > 0.001$  unc, no minimal cluster threshold.

Figure S2. Distribution of percent signal change (PSC) across the 4 game partners in each ROI, Related to Figure 1.

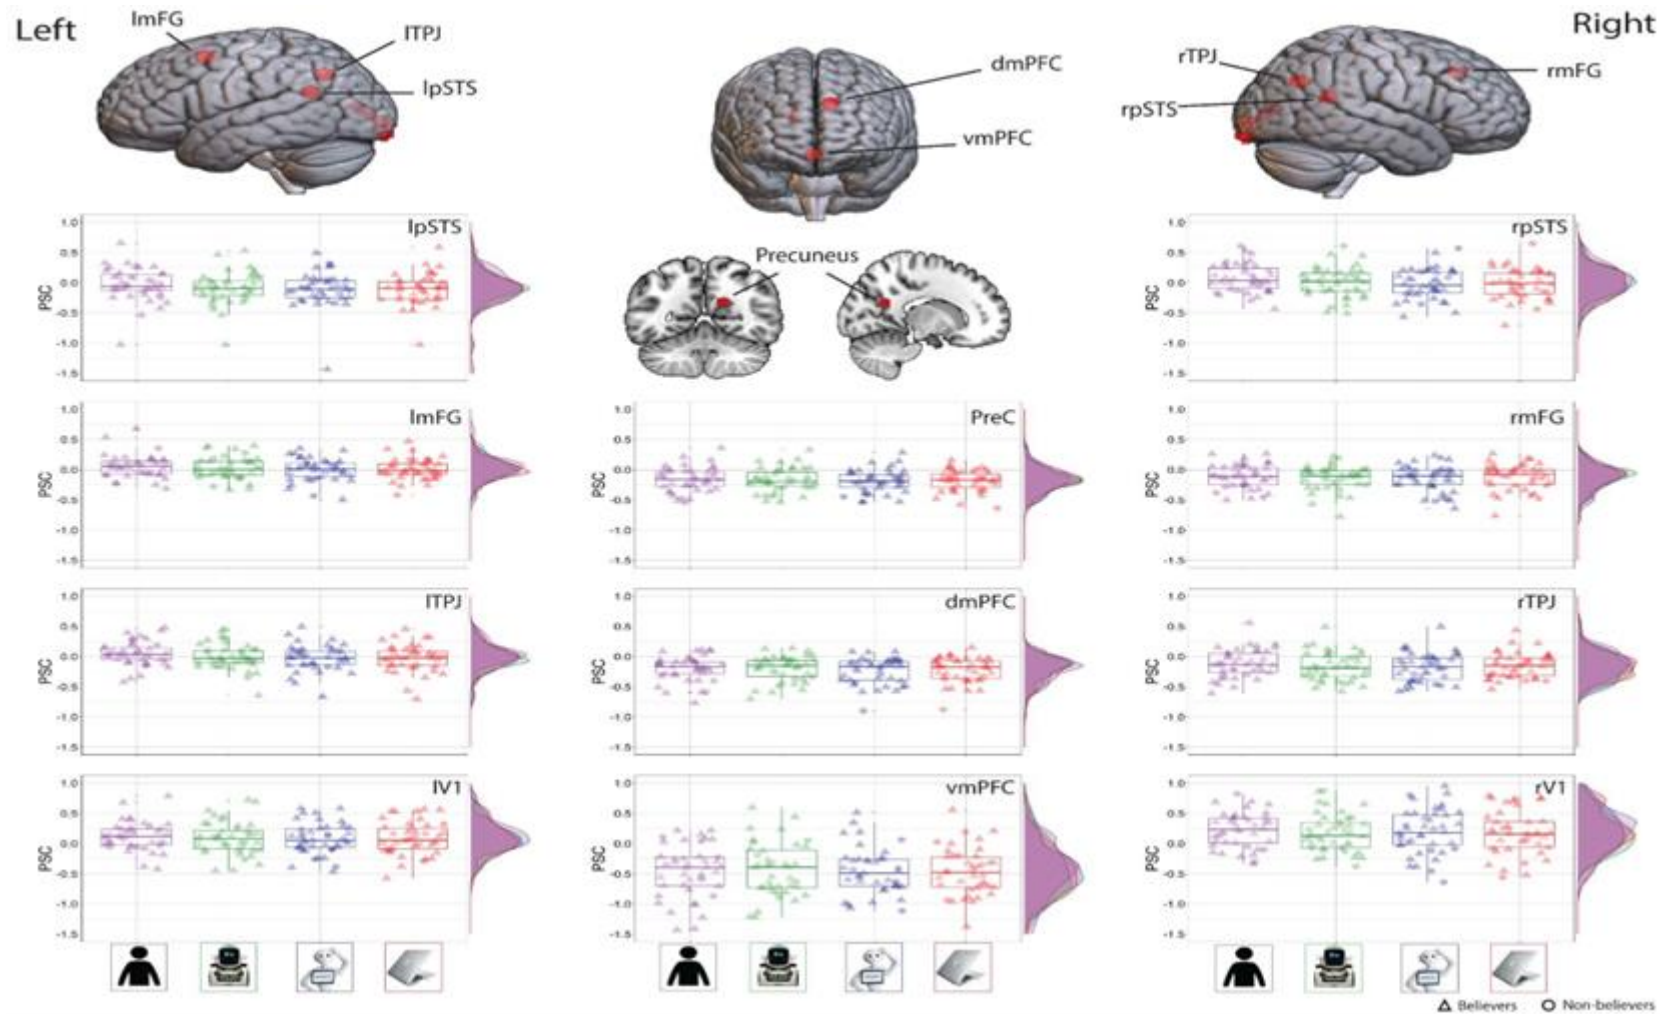

**Note.** Example 6mm ROI search spheres; see Table S3 for peak coordinates. mFG = left middle frontal gyrus; TPJ = temporal parietal junction; pSTS = posterior superior temporal sulcus; vmPFC = ventromedial prefrontal cortex; dmPFC = dorsomedial prefrontal cortex; PreC = precuneus. Boxplots show 1st-3rd quartiles. Triangular data points represent "true believers"; circular data points represent "non-believers."

Figure S3. Distribution of rating responses for each of the six debrief questions, Related to Figure 3.

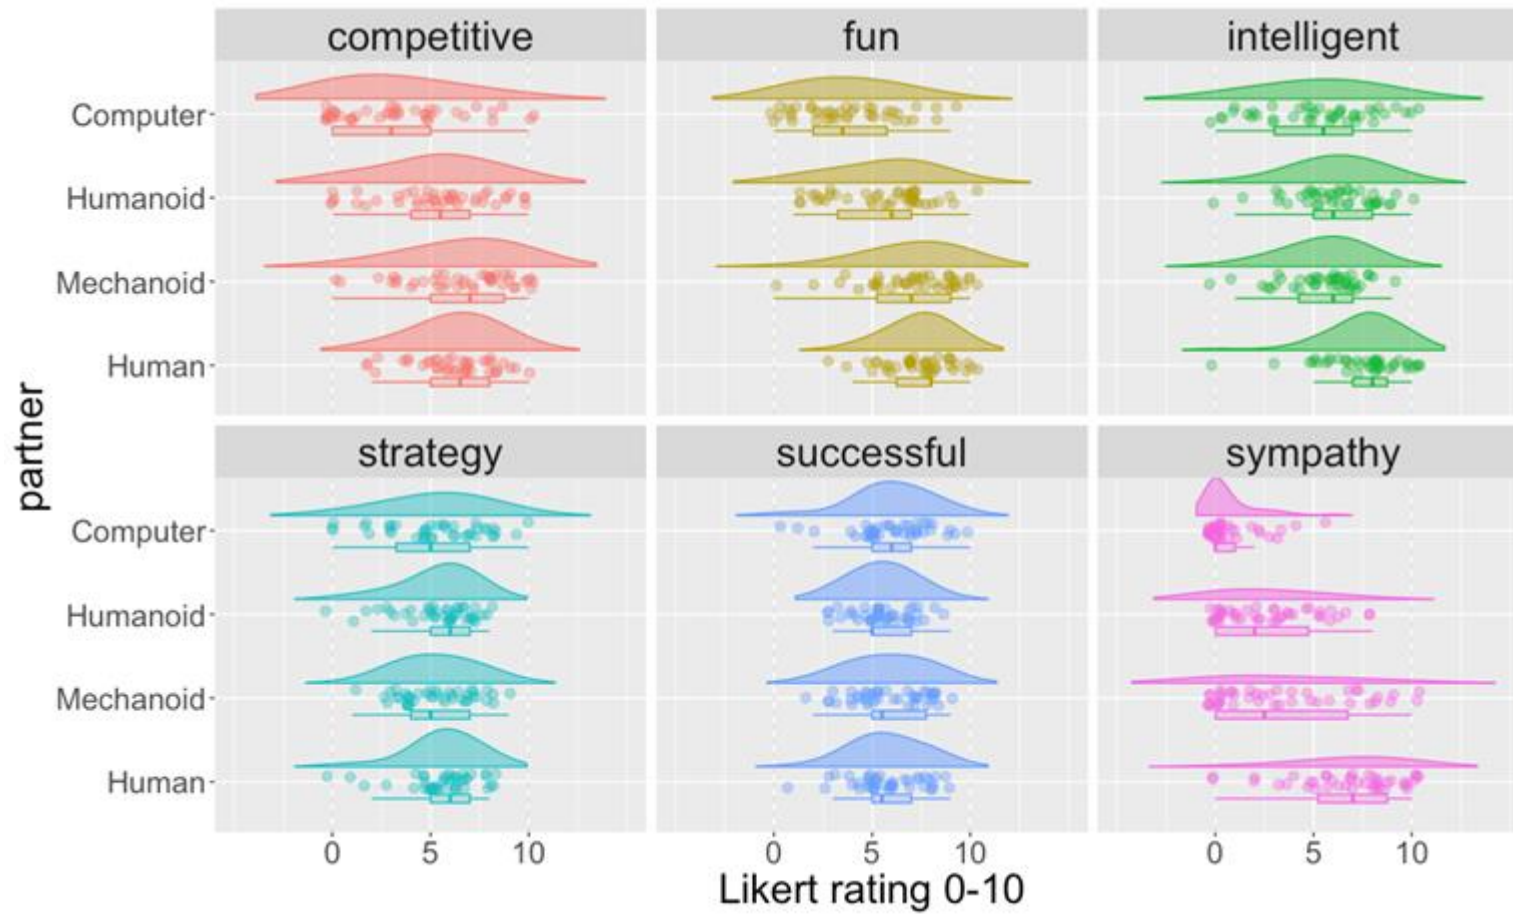

Note. Boxplot show 1st-3rd quartiles.

Figure S4. Experimental paradigm, Related to STAR Methods.

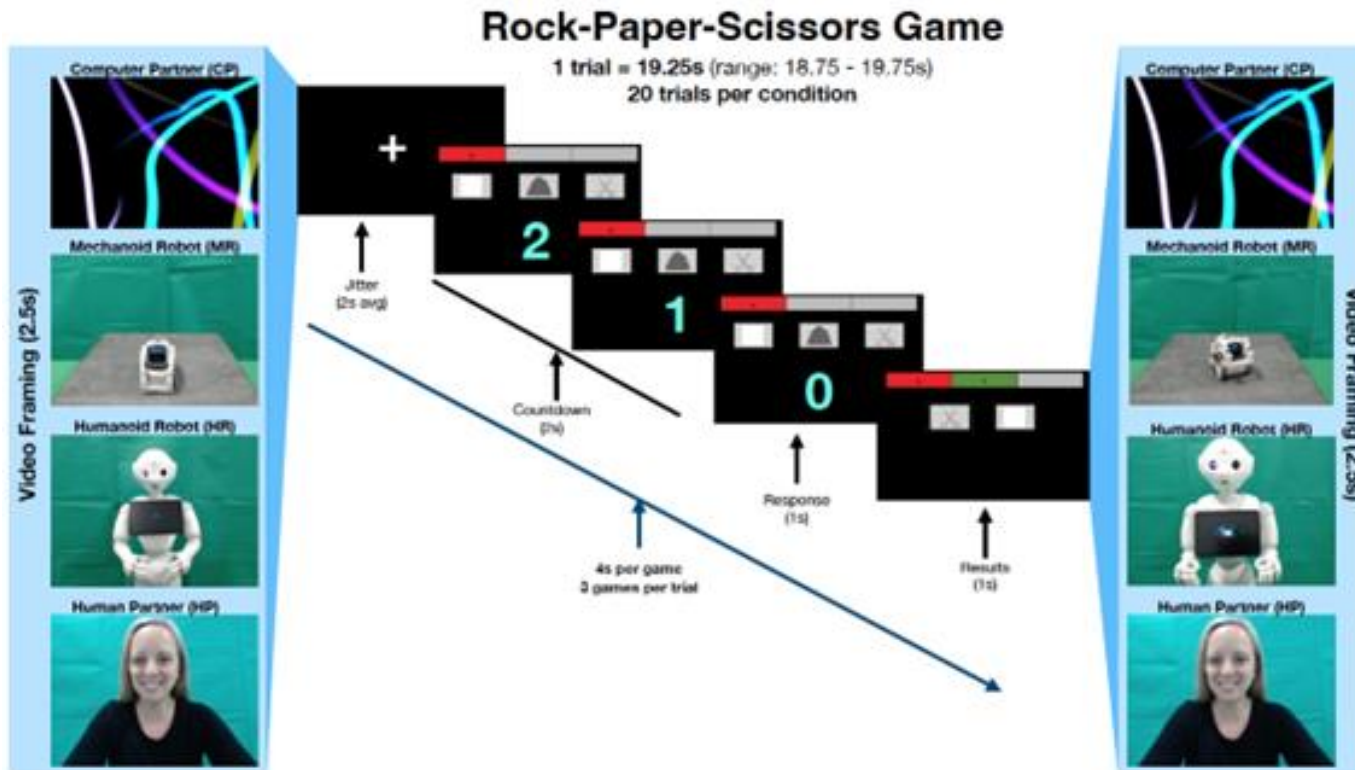

**Note.** Each game lasts 4 seconds and includes a countdown from 2 to 0; participants respond on '0' and then the results of the game are shown to the participant before the next game in the series commences. Participants play 3 games against one opponent per trial. Each trial is preceded by a 2.5 second video of their opponent (video framing) and concluded by a 2.75 second (video feedback) of their opponent; each series of 3 games lasts 12 seconds without video framing and feedback (average of 19.25 second in total).
